# Supplementary material
Source: PubMed Central journal article supplement (PMC3970495)
Supplement: 1313368111_pnas.201313368SI.pdf [file 1313368111_pnas.201313368SI.pdf]

# Supporting Information

Holden et al. 10.1073/pnas.1313368111

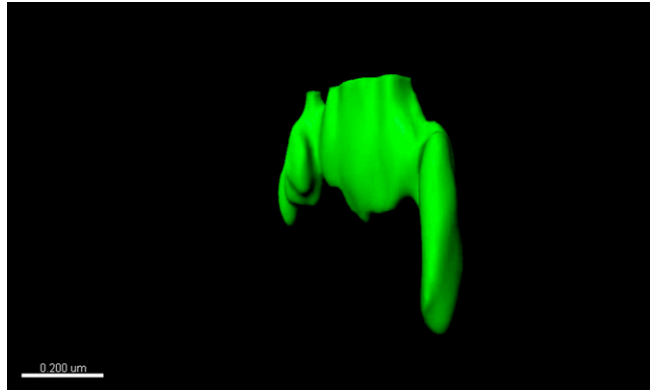

**Movie S1.** 3D volume and isosurface rendering of a patchy early predivisional Z-ring. Video shows same cell as Fig. 3 A, *iv*.

[Movie S1](#)

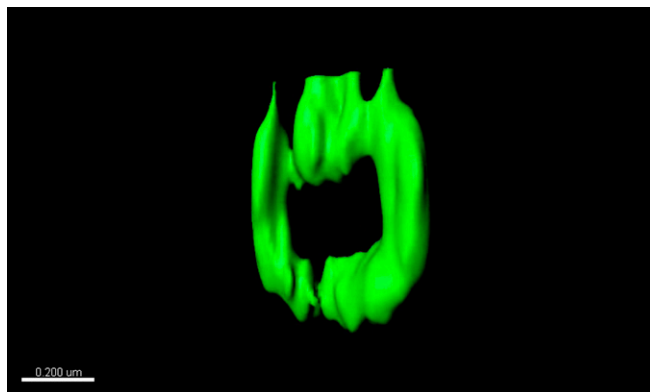

**Movie S2.** 3D volume and isosurface rendering of a complete early predivisional Z-ring. Video shows same cell as Fig. 3 A, *v*.

[Movie S2](#)

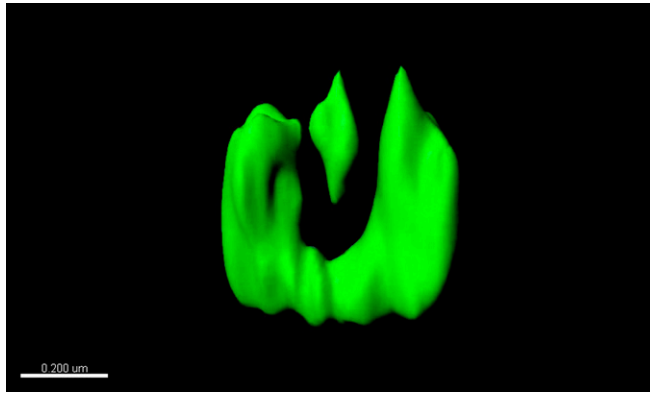

**Movie S3.** 3D volume and isosurface rendering of an incomplete mid/late predivisional Z-ring, #1. Video shows same cell as Fig. 3 B, *ii*.

[Movie S3](#)

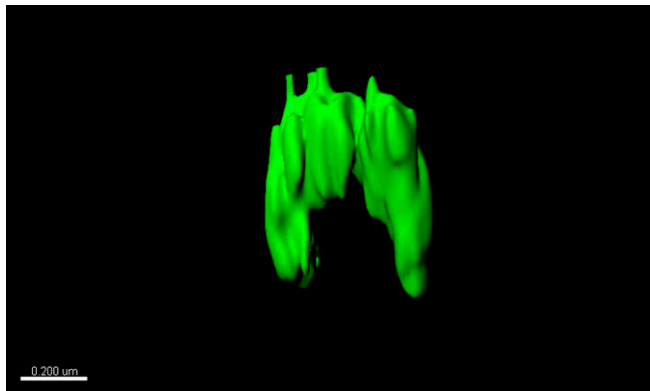

**Movie S4.** 3D volume and isosurface rendering of an incomplete mid/late predivisional Z-ring, #2. Video shows same cell as Fig. 3 B, *iv*.

[Movie S4](#)

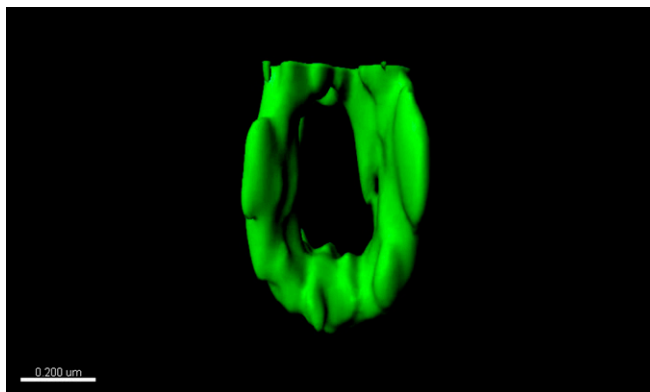

**Movie S5.** 3D volume and isosurface rendering of a Z-ring for an SOS-induced cell, #1. Video shows same cell as Fig. S12A.

[Movie S5](#)

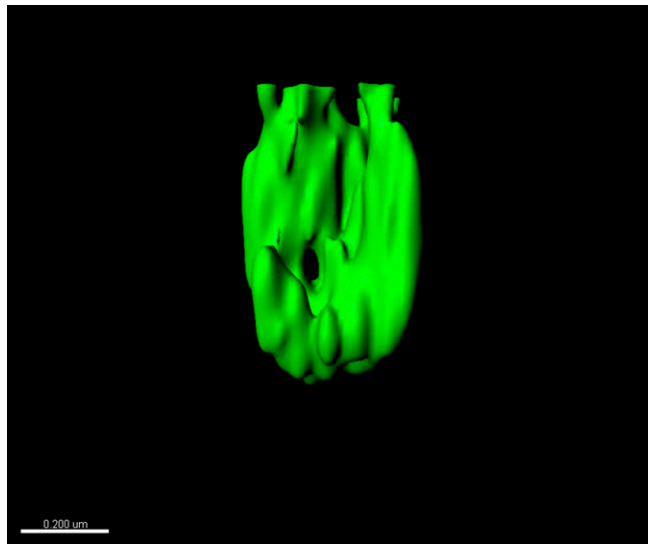

**Movie S6.** 3D volume and isosurface rendering of a Z-ring for an SOS-induced cell, #2. Video shows same cell as Fig. S12B.

[Movie S6](#)

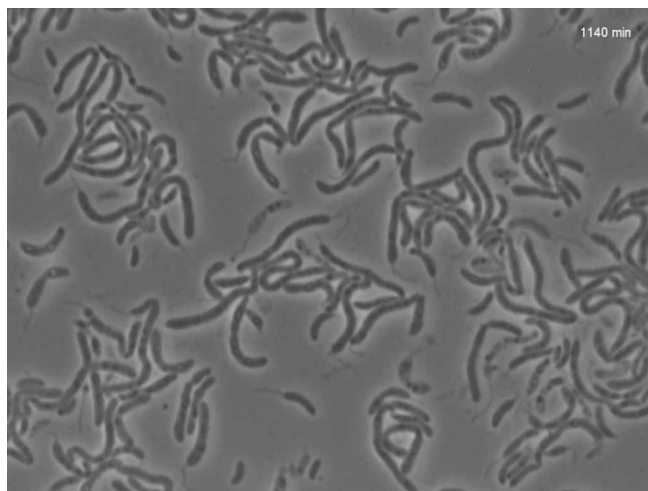

**Movie S7.** Timelapse phase contrast imaging of cells in the presence of 0.8 μg/mL mitomycin C.

[Movie S7](#)

## Other Supporting Information Files

[SI Appendix \(PDF\)](#)
